# Supplementary material for: QM/MM investigation on 1,3-dipolar cycloadditions of the phthalazinium dicyanomethanide with three different dipolarophiles on water and in solution
Source: Royal Society of Chemistry journal article supplement (doi:10.1039/c3cp51048d), 2013-01-01
Supplement: c3cp51048d.pdf [file c3cp51048d.pdf]

Supporting Information

**QM/MM investigation on 1,3-dipolar cycloadditions of  
phthalazinium dicyanomethanide with three different  
dipolarophiles on water and in solutions**

Xin Yang, Ying Xue\*

College of Chemistry,  
Key Lab of Green Chemistry and Technology in Ministry of Education,  
Sichuan University, Chengdu 610064,  
People's Republic of China

|                                                                                                                                                                                                                                                                                                                                                                                                                                          |    |
|------------------------------------------------------------------------------------------------------------------------------------------------------------------------------------------------------------------------------------------------------------------------------------------------------------------------------------------------------------------------------------------------------------------------------------------|----|
| <b>Table S1.</b> Computed and experimental densities of water-acetonitrile mixture solvents at 25 °C ( $\text{g}\cdot\text{cm}^{-3}$ ) ..                                                                                                                                                                                                                                                                                                | 3  |
| <b>Figure S1.</b> Illustration of the 0.619-mixture solvent box.....                                                                                                                                                                                                                                                                                                                                                                     | 4  |
| <b>Figure S2.</b> Illustration of the 0.9-mixture solvent box.....                                                                                                                                                                                                                                                                                                                                                                       | 5  |
| <b>Figure S3.</b> (A) Side and (B) overhead illustration of “on water” 1,3-dipolar cycloadditions with MVK transition structure from the QM/MM/MC calculations. ....                                                                                                                                                                                                                                                                     | 6  |
| <b>Figure S4.</b> (A) Side and (B) overhead illustration of “on water” 1,3-dipolar cycloadditions with MAC transition structure from the QM/MM/MC calculations.....                                                                                                                                                                                                                                                                      | 7  |
| <b>Figure S5.</b> (A) Side and (B) overhead illustration of “on water” 1,3-dipolar cycloadditions with MVK transition structure from the QM/MM/MC calculations. ....                                                                                                                                                                                                                                                                     | 8  |
| <b>Figure S6.</b> Solute-solvent energy pair distribution for the transition structure (solid) and reactant (solid) of the 1,3-dipolar cycloadditions of 1,3-dipolar <b>1</b> and MAC at CH <sub>3</sub> CN, in water, and on water. The ordinate records the number of solvent molecules that interact with the solutes with their interaction energy on the abscissa. Units for the ordinate are number of molecules per kcal/mol..... | 9  |
| <b>Figure S7.</b> Solute-solvent energy pair distribution for the transition structure (solid) and reactant (solid) of the 1,3-dipolar cycloadditions of 1,3-dipolar <b>1</b> and STY at CH <sub>3</sub> CN, in water, and on water. The ordinate records the number of solvent molecules that interact with the solutes with their interaction energy on the abscissa. Units for the ordinate are number of molecules per kcal/mol..... | 10 |
| Condensed-phase B3LYP/6-311+G(2d,p) 1,3-dipolar <b>1</b> and MVK optimizations in PCM.....                                                                                                                                                                                                                                                                                                                                               | 11 |
| Condensed-phase B3LYP/6-311+G(2d,p) 1,3-dipolar <b>1</b> and MAC optimizations in PCM.....                                                                                                                                                                                                                                                                                                                                               | 12 |
| Condensed-phase B3LYP/6-311+G(2d,p) 1,3-dipolar <b>1</b> and STY optimizations in PCM.....                                                                                                                                                                                                                                                                                                                                               | 15 |
| Gas-phase B3LYP/6-311+G(2d,p) 1,3-dipolar <b>1</b> and MVK optimizations.....                                                                                                                                                                                                                                                                                                                                                            | 17 |
| Gas-phase B3LYP/6-311+G(2d,p) 1,3-dipolar <b>1</b> and MAC optimizations.....                                                                                                                                                                                                                                                                                                                                                            | 18 |
| Gas-phase B3LYP/6-311+G(2d,p) 1,3-dipolar <b>1</b> and STY optimizations.....                                                                                                                                                                                                                                                                                                                                                            | 19 |

**Table S1.** Computed and experimental densities of water-acetonitrile mixture solvents  
at 25 °C (g.cm<sup>-3</sup>)

| $X_{\text{H}_2\text{O}}$ | $\rho$ (calcd) | $\rho$ (exptl)      | ref. |
|--------------------------|----------------|---------------------|------|
| 0.619                    | 0.8506         | 0.8707 <sup>a</sup> | 1    |
| 0.9                      | 0.9617         | 0.9847 <sup>b</sup> | 2    |

<sup>a</sup> Based on values at 20 °C,  $X_{\text{H}_2\text{O}}=0.957$

References:

- (1) J. Chem. Eng. Data 1967, 12, 336-337.
- (2) J. Chem. Eng. Data 2008, 53, 578-585.

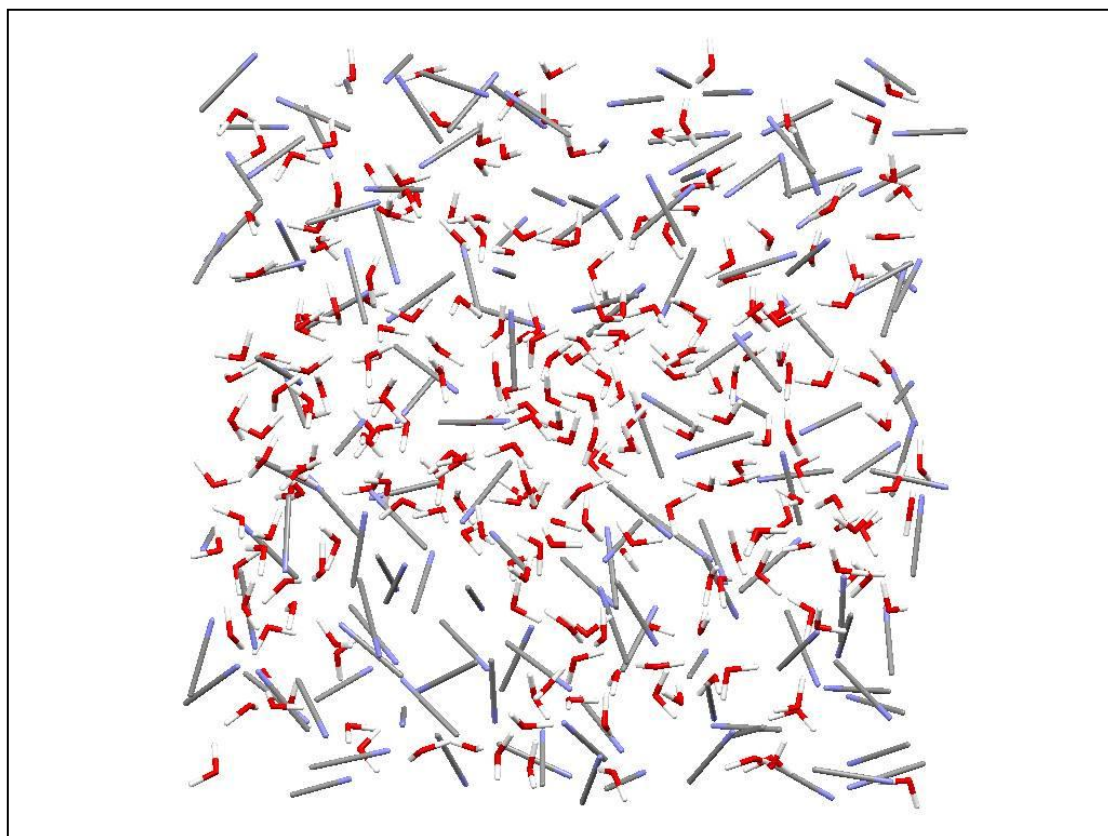

*Figure S1.* Illustration of the 0.619-mixture solvent box

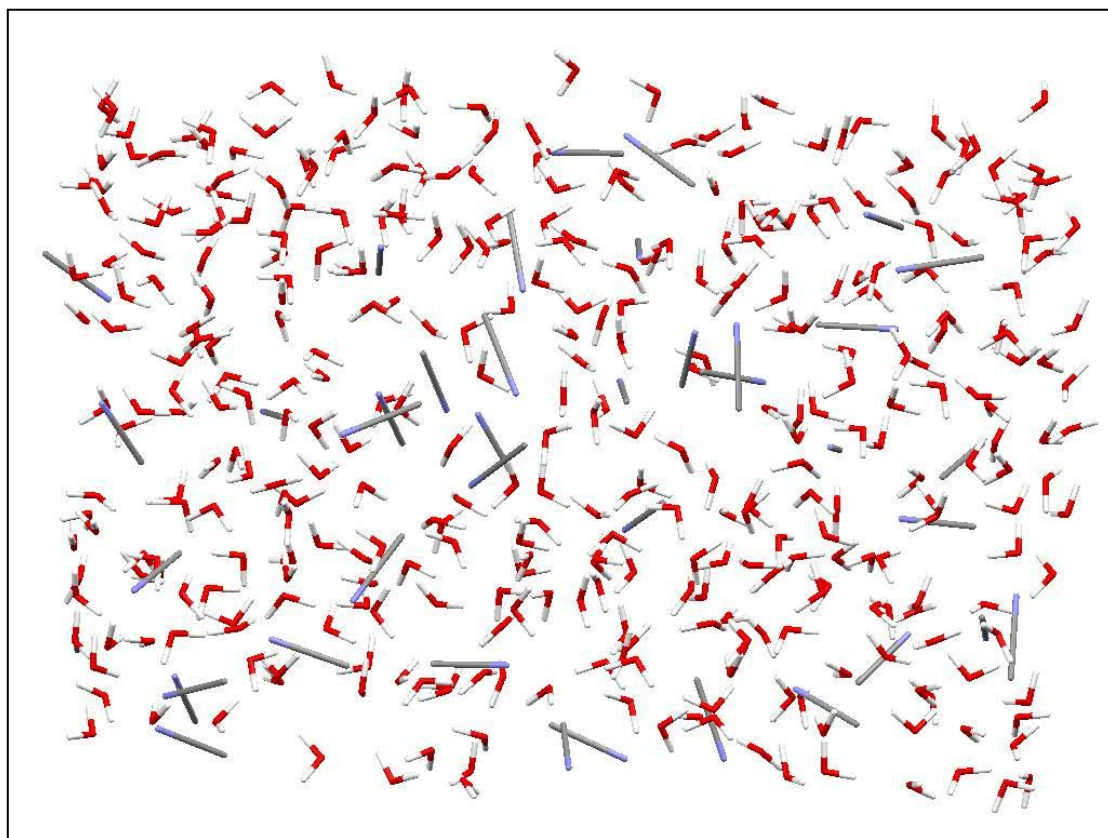

*Figure S2.* Illustration of the 0.9-mixture solvent box

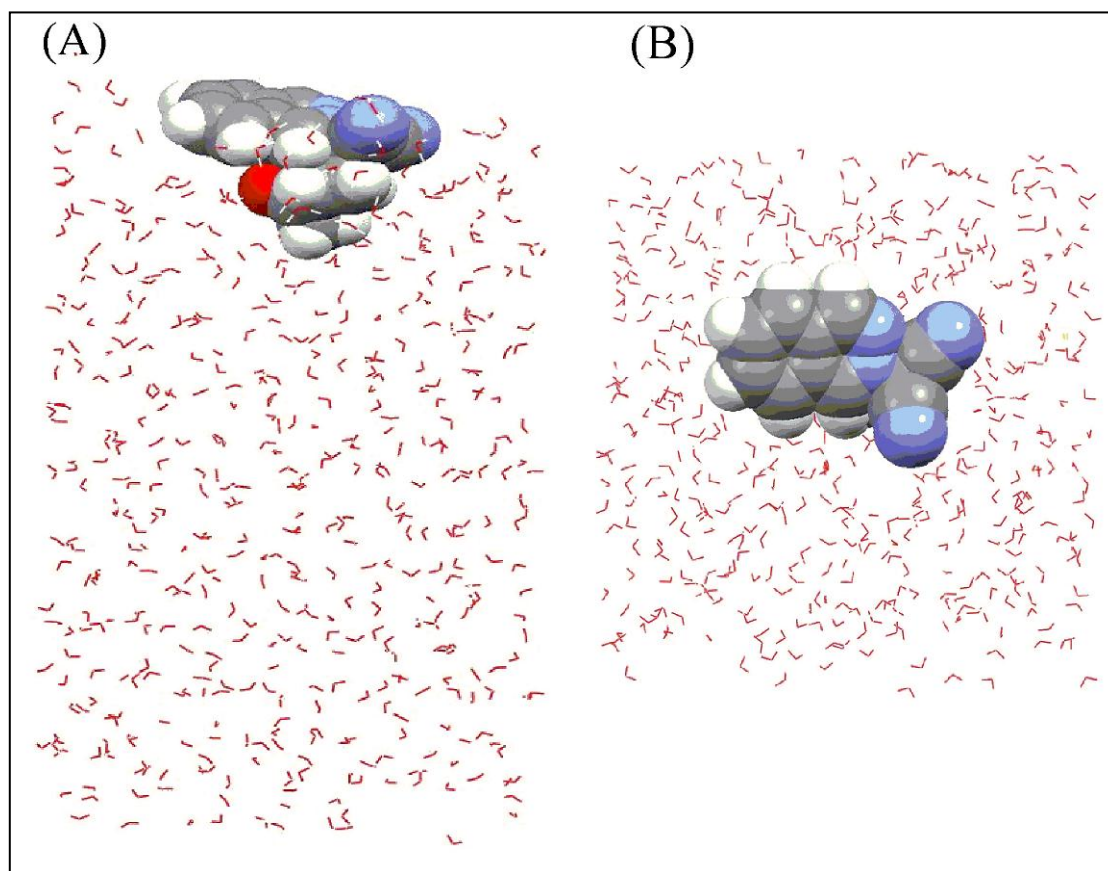

**Figure S3.** (A) Side and (B) overhead illustration of “on water” 1,3-dipolar cycloadditions with MVK transition structure from the QM/MM/MC calculations.

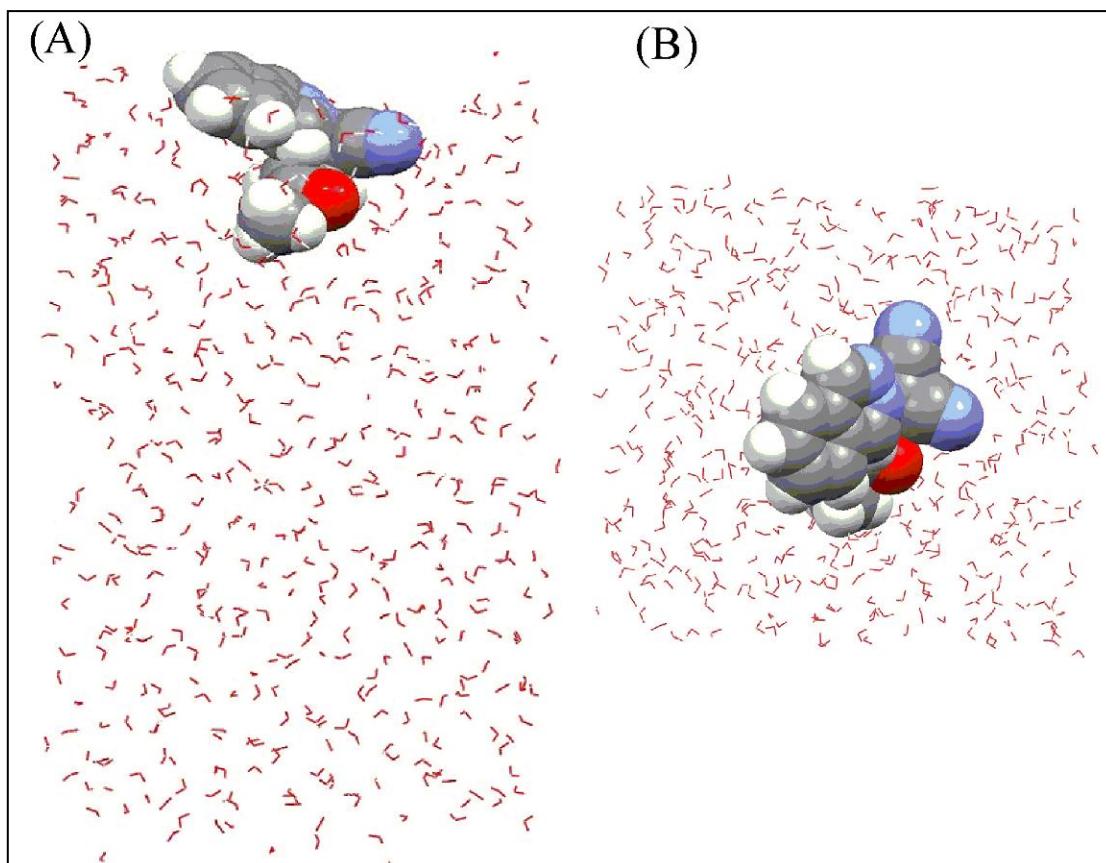

**Figure S4.** (A) Side and (B) overhead illustration of “on water” 1,3-dipolar cycloadditions with MAC transition structure from the QM/MM/MC calculations.

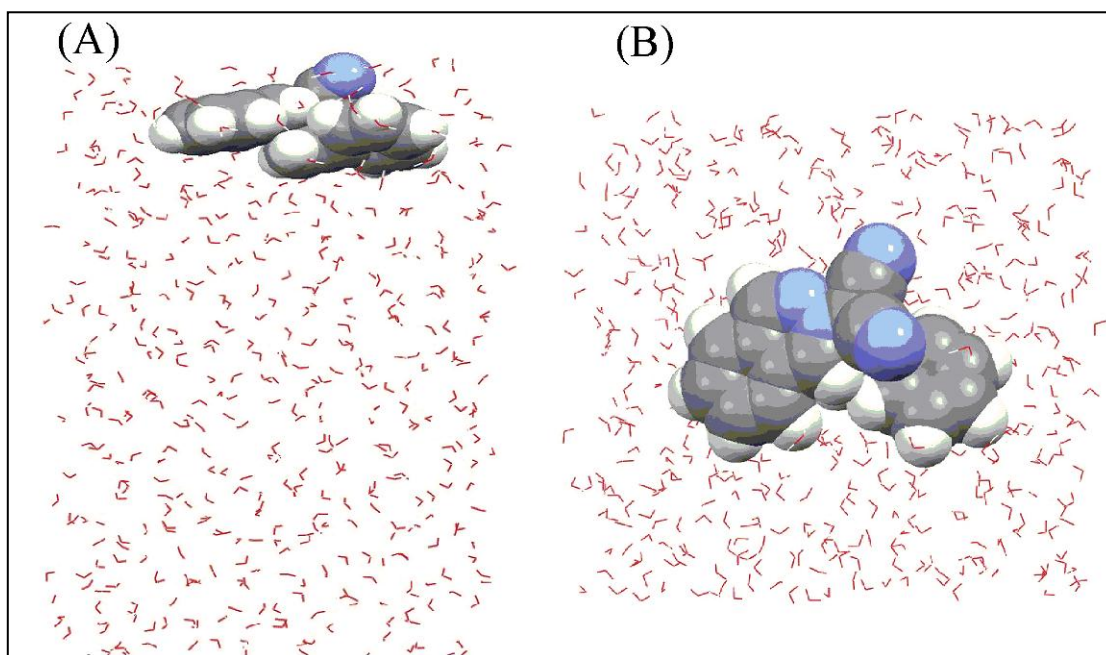

**Figure S5.** (A) Side and (B) overhead illustration of “on water” 1,3-dipolar cycloadditions with MVK transition structure from the QM/MM/MC calculations.



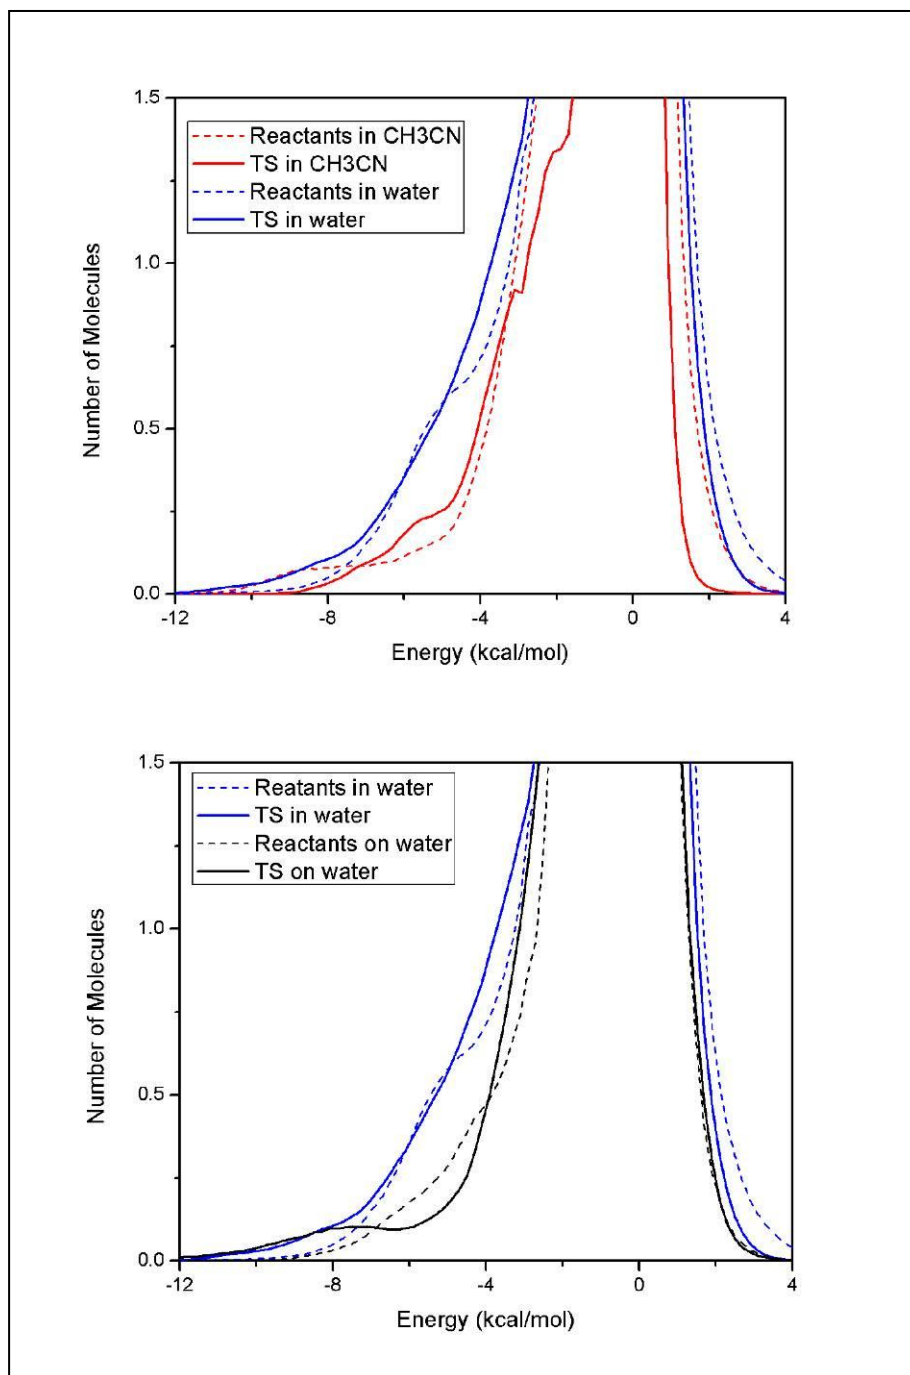

**Figure S6.** Solute-solvent energy pair distribution for the transition structure (solid) and reactant (dashed) of the 1,3-dipolar cycloadditions of 1,3-dipolar **1** and MAC at CH<sub>3</sub>CN, in water, and on water. The ordinate records the number of solvent molecules that interact with the solutes with their interaction energy on the abscissa. Units for the ordinate are number of molecules per kcal/mol.

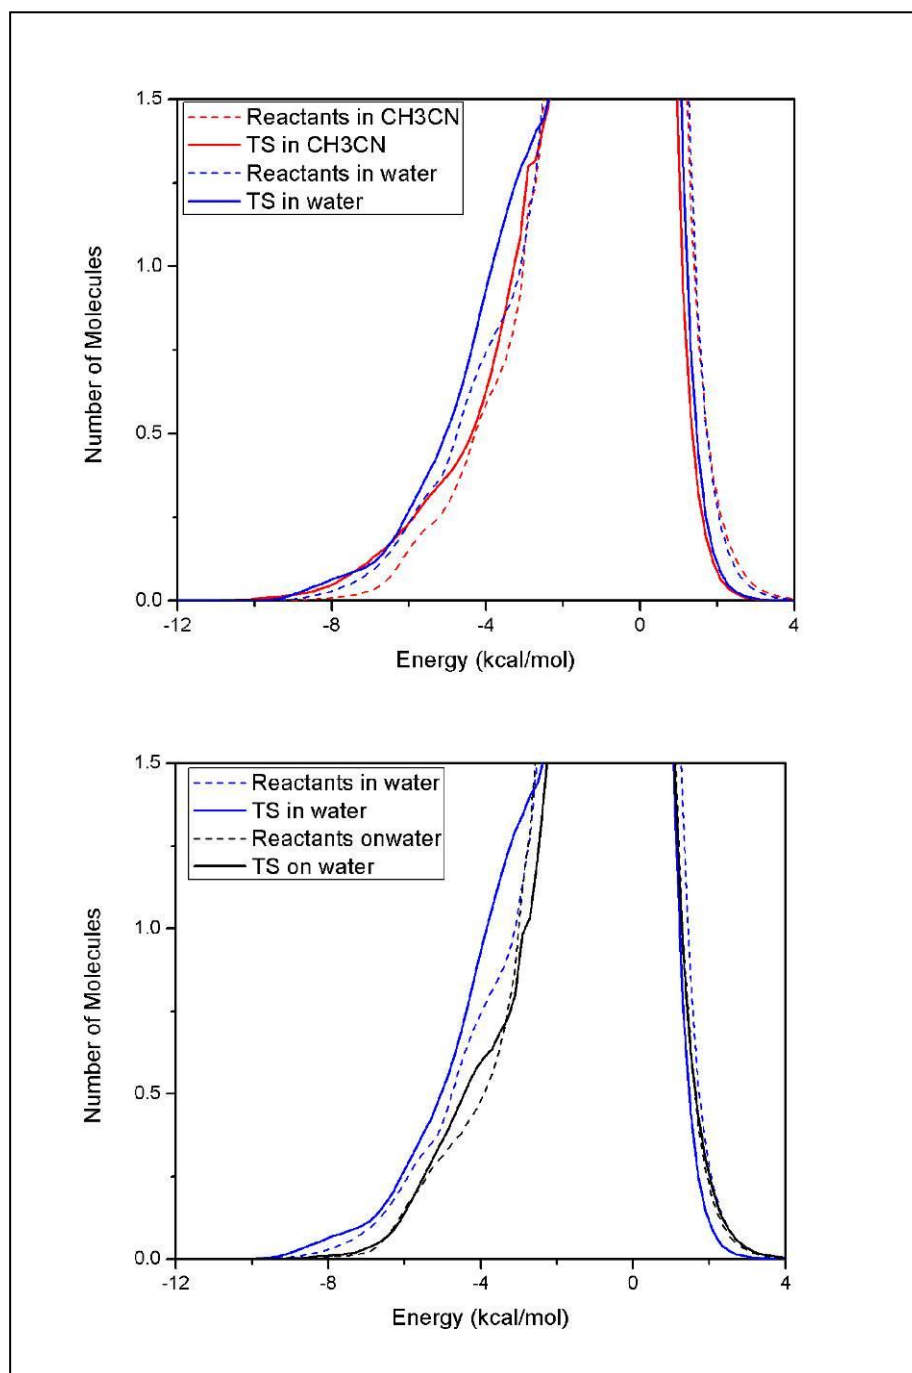

**Figure S7.** Solute-solvent energy pair distribution for the transition structure (solid) and reactant (solid) of the 1,3-dipolar cycloadditions of 1,3-dipolar **1** and STY at CH<sub>3</sub>CN, in water, and on water. The ordinate records the number of solvent molecules that interact with the solutes with their interaction energy on the abscissa. Units for the ordinate are number of molecules per kcal/mol.

**Condensed-phase B3LYP/6-311+G(2d,p) 1,3-dipolar 1 and MVK optimizations in PCM:**

**Water transition structure**

|                | 1         | 2       | 3       |
|----------------|-----------|---------|---------|
|                | A         | A       | A       |
| Frequencies -- | -353.6722 | 36.9766 | 44.5820 |
| Red. masses -- | 10.5159   | 4.8019  | 7.4867  |
| Frc consts --  | 0.7750    | 0.0039  | 0.0088  |
| IR Inten --    | 400.4743  | 11.1231 | 20.1260 |

|                                              |             |
|----------------------------------------------|-------------|
| Sum of electronic and zero-point Energies=   | -872.947542 |
| Sum of electronic and thermal Energies=      | -872.930029 |
| Sum of electronic and thermal Enthalpies=    | -872.929085 |
| Sum of electronic and thermal Free Energies= | -872.993605 |

|   |             |             |             |
|---|-------------|-------------|-------------|
| C | 0.73341800  | -1.70959800 | -1.26498900 |
| N | -0.52548500 | -1.54561400 | -1.00714300 |
| H | 0.94322900  | -2.27878100 | -2.16349600 |
| N | -0.84043900 | -0.86183400 | 0.13562200  |
| C | -3.10397100 | -1.14383200 | -0.66251000 |
| C | -2.70553100 | -0.46119500 | 1.59965200  |
| N | -3.89976600 | -1.58311900 | -1.36922000 |
| N | -3.10852600 | -0.40140900 | 2.67644700  |
| C | -1.00851800 | 2.00452100  | 0.22666100  |
| H | -1.03062300 | 2.41699600  | 1.22979800  |
| C | 0.11626400  | 2.42088100  | -0.56143200 |
| O | 1.01136500  | 3.13610900  | -0.07465800 |
| C | -2.20650700 | -0.46040300 | 0.23997400  |
| C | -2.18286100 | 1.36547600  | -0.26048300 |
| H | -3.12077700 | 1.66732200  | 0.19552100  |
| H | -2.27681400 | 1.25323300  | -1.33548600 |
| C | 0.06377800  | -0.22388400 | 0.90626700  |
| H | -0.28511900 | 0.19133500  | 1.83694000  |
| C | 1.80478500  | -1.20156000 | -0.46409100 |
| C | 3.15507500  | -1.43692500 | -0.75394400 |
| C | 1.44740500  | -0.43463100 | 0.66910100  |
| C | 4.12846800  | -0.91441300 | 0.07600600  |
| H | 3.42362700  | -2.02538400 | -1.62248400 |
| C | 2.44838600  | 0.09092600  | 1.50245500  |
| C | 3.77372400  | -0.15261000 | 1.20148200  |
| H | 5.17413000  | -1.09206800 | -0.14032800 |
| H | 2.17496600  | 0.67827100  | 2.36936400  |
| H | 4.55059600  | 0.24786600  | 1.84024200  |
| C | 0.22900700  | 2.03850700  | -2.02843000 |
| H | -0.37884000 | 1.18422100  | -2.32224600 |

|   |             |            |             |
|---|-------------|------------|-------------|
| H | -0.07751700 | 2.89467800 | -2.63636600 |
| H | 1.27421200  | 1.82971600 | -2.25845000 |

CH<sub>3</sub>CN transition structure

|                | 1         | 2       | 3       |
|----------------|-----------|---------|---------|
|                | A         | A       | A       |
| Frequencies -- | -358.1136 | 36.3808 | 47.4716 |
| Red. masses -- | 10.5290   | 4.8826  | 7.4787  |
| Frc consts --  | 0.7956    | 0.0038  | 0.0099  |
| IR Inten --    | 391.9964  | 9.2462  | 19.3566 |

|                                              |             |
|----------------------------------------------|-------------|
| Sum of electronic and zero-point Energies=   | -872.946852 |
| Sum of electronic and thermal Energies=      | -872.929355 |
| Sum of electronic and thermal Enthalpies=    | -872.928411 |
| Sum of electronic and thermal Free Energies= | -872.992826 |

|   |             |             |             |
|---|-------------|-------------|-------------|
| C | 0.72920400  | -1.70993100 | -1.26442700 |
| N | -0.52944500 | -1.54528600 | -1.00658000 |
| H | 0.93857400  | -2.27914900 | -2.16305600 |
| N | -0.84427400 | -0.86191800 | 0.13662300  |
| C | -3.10776400 | -1.13581200 | -0.66490200 |
| C | -2.70915400 | -0.45837100 | 1.59948900  |
| N | -3.90425000 | -1.57016100 | -1.37389300 |
| N | -3.11201500 | -0.39766900 | 2.67631500  |
| C | -0.99699300 | 2.00100100  | 0.22953800  |
| H | -1.01422100 | 2.41342600  | 1.23274800  |
| C | 0.12794500  | 2.41436700  | -0.56211600 |
| O | 1.02827000  | 3.12169900  | -0.07586400 |
| C | -2.20906200 | -0.45871700 | 0.24053900  |
| C | -2.17702200 | 1.37310500  | -0.25650400 |
| H | -3.11170400 | 1.67777000  | 0.20403100  |
| H | -2.27465600 | 1.26283400  | -1.33136500 |
| C | 0.06061400  | -0.22181800 | 0.90592300  |
| H | -0.28720300 | 0.18938900  | 1.83875700  |
| C | 1.80112800  | -1.20264400 | -0.46348700 |
| C | 3.15114300  | -1.43971900 | -0.75298200 |
| C | 1.44440300  | -0.43489900 | 0.66916700  |
| C | 4.12515700  | -0.91796300 | 0.07674900  |
| H | 3.41912300  | -2.02890600 | -1.62124100 |
| C | 2.44585100  | 0.09004500  | 1.50206800  |
| C | 3.77105300  | -0.15513100 | 1.20154900  |
| H | 5.17064300  | -1.09688400 | -0.13944000 |
| H | 2.17305500  | 0.67882900  | 2.36818700  |

|   |             |            |             |
|---|-------------|------------|-------------|
| H | 4.54818100  | 0.24526100 | 1.84006000  |
| C | 0.23127700  | 2.03675200 | -2.03108500 |
| H | -0.37180400 | 1.17775800 | -2.32128400 |
| H | -0.08911200 | 2.89142600 | -2.63401800 |
| H | 1.27618200  | 1.83831000 | -2.27083500 |

**Condensed-phase B3LYP/6-311+G(2d,p) 1,3-dipolar 1 and MAC optimizations in PCM:  
Water transition structure**

|                | 1         | 2       | 3       |
|----------------|-----------|---------|---------|
|                | A         | A       | A       |
| Frequencies -- | -411.9268 | 25.5986 | 47.9038 |
| Red. masses -- | 10.9107   | 5.2734  | 5.8751  |
| Frc consts --  | 1.0908    | 0.0020  | 0.0079  |
| IR Inten --    | 445.9180  | 4.6187  | 4.3234  |

|                                              |             |
|----------------------------------------------|-------------|
| Sum of electronic and zero-point Energies=   | -948.198419 |
| Sum of electronic and thermal Energies=      | -948.179940 |
| Sum of electronic and thermal Enthalpies=    | -948.178995 |
| Sum of electronic and thermal Free Energies= | -948.245965 |

|   |             |             |             |
|---|-------------|-------------|-------------|
| C | -0.62587800 | -0.91067000 | 1.89484400  |
| N | 0.63551000  | -0.84270300 | 1.61716100  |
| H | -0.86234500 | -0.88453800 | 2.95264800  |
| N | 0.98519600  | -0.90968500 | 0.29401000  |
| C | 3.19579900  | -0.42715500 | 1.14404700  |
| C | 2.92287600  | -1.29762900 | -1.07572400 |
| N | 3.96324700  | -0.25303900 | 1.98527300  |
| N | 3.40057400  | -1.84797600 | -1.96801300 |
| C | 0.84055800  | 1.34435900  | -1.36973300 |
| H | 0.75286800  | 1.17008500  | -2.43344000 |
| C | -0.27414600 | 2.07475800  | -0.80139900 |
| O | -1.28542800 | 2.38779800  | -1.41683100 |
| C | 2.32533800  | -0.54511800 | 0.00254800  |
| C | 2.11019800  | 1.24929900  | -0.75255100 |
| H | 2.97802300  | 1.24917300  | -1.40204000 |
| H | 2.25464400  | 1.81475700  | 0.16033000  |
| C | 0.09620700  | -0.85449500 | -0.72908500 |
| H | 0.47474300  | -1.08474100 | -1.71121500 |
| C | -1.67350800 | -1.01970500 | 0.92274500  |
| C | -3.02467000 | -1.15006800 | 1.27038000  |
| C | -1.29136100 | -1.00958900 | -0.43631500 |
| C | -3.97576700 | -1.26838700 | 0.27479000  |

|   |             |             |             |
|---|-------------|-------------|-------------|
| H | -3.31157100 | -1.15975500 | 2.31469100  |
| C | -2.26785300 | -1.13290600 | -1.43663800 |
| C | -3.59545100 | -1.26090800 | -1.07642100 |
| H | -5.02148300 | -1.36918100 | 0.53594700  |
| H | -1.97694600 | -1.12407200 | -2.47955300 |
| H | -4.35235900 | -1.35641900 | -1.84463600 |
| O | -0.10811400 | 2.38546600  | 0.51094600  |
| C | -1.16667400 | 3.13624500  | 1.12959500  |
| H | -0.85071900 | 3.29071200  | 2.15813800  |
| H | -1.30002500 | 4.09472300  | 0.62848300  |
| H | -2.10218700 | 2.57878700  | 1.10221900  |

CH<sub>3</sub>CN transition structure

|                | 1         | 2       | 3       |
|----------------|-----------|---------|---------|
|                | A         | A       | A       |
| Frequencies -- | -412.7982 | 25.6464 | 48.0514 |
| Red. masses -- | 10.9065   | 5.2833  | 5.9352  |
| Frc consts --  | 1.0950    | 0.0020  | 0.0081  |
| IR Inten --    | 435.9347  | 4.3281  | 4.4816  |

|                                              |             |
|----------------------------------------------|-------------|
| Sum of electronic and zero-point Energies=   | -948.197829 |
| Sum of electronic and thermal Energies=      | -948.179347 |
| Sum of electronic and thermal Enthalpies=    | -948.178403 |
| Sum of electronic and thermal Free Energies= | -948.245381 |

|   |             |             |             |
|---|-------------|-------------|-------------|
| C | -0.62356200 | -0.91636300 | 1.89332000  |
| N | 0.63771700  | -0.84690600 | 1.61586900  |
| H | -0.85989500 | -0.89346200 | 2.95125800  |
| N | 0.98757700  | -0.90991700 | 0.29260600  |
| C | 3.19805900  | -0.42788400 | 1.14370600  |
| C | 2.92469300  | -1.29037100 | -1.07969900 |
| N | 3.96574400  | -0.25519800 | 1.98502600  |
| N | 3.40141300  | -1.83596600 | -1.97546900 |
| C | 0.83900900  | 1.34764900  | -1.36573800 |
| H | 0.75262400  | 1.17615200  | -2.43002800 |
| C | -0.27833700 | 2.07476000  | -0.79720300 |
| O | -1.28911500 | 2.38658500  | -1.41335200 |
| C | 2.32728200  | -0.54384200 | 0.00250100  |
| C | 2.10826800  | 1.25518300  | -0.74826000 |
| H | 2.97673500  | 1.25795100  | -1.39684000 |
| H | 2.25056900  | 1.81736400  | 0.16695000  |
| C | 0.09842200  | -0.85189500 | -0.73053600 |
| H | 0.47712600  | -1.08060700 | -1.71297000 |

|   |             |             |             |
|---|-------------|-------------|-------------|
| C | -1.67122300 | -1.02321900 | 0.92096100  |
| C | -3.02227300 | -1.15562000 | 1.26828100  |
| C | -1.28912200 | -1.00890400 | -0.43805500 |
| C | -3.97343000 | -1.27165600 | 0.27250300  |
| H | -3.30904300 | -1.16864200 | 2.31262000  |
| C | -2.26572000 | -1.12975300 | -1.43853700 |
| C | -3.59319100 | -1.25975700 | -1.07865200 |
| H | -5.01906100 | -1.37391500 | 0.53344900  |
| H | -1.97506300 | -1.11707300 | -2.48147300 |
| H | -4.35006700 | -1.35313400 | -1.84716000 |
| O | -0.11450100 | 2.38293900  | 0.51601500  |
| C | -1.17560200 | 3.13025100  | 1.13440500  |
| H | -0.86181300 | 3.28299200  | 2.16388400  |
| H | -1.30996100 | 4.08953700  | 0.63511600  |
| H | -2.11001900 | 2.57109600  | 1.10368300  |

**Condensed-phase B3LYP/6-311+G(2d,p) 1,3-dipolar 1 and STY optimizations in PCM:**

Water transition structure

|                | 1         | 2       | 3       |
|----------------|-----------|---------|---------|
|                | A         | A       | A       |
| Frequencies -- | -417.8401 | 29.7182 | 46.6946 |
| Red. masses -- | 11.3743   | 5.5301  | 5.5905  |
| Frc consts --  | 1.1700    | 0.0029  | 0.0072  |
| IR Inten --    | 851.3613  | 3.6999  | 3.9263  |

|                                              |             |
|----------------------------------------------|-------------|
| Sum of electronic and zero-point Energies=   | -951.328931 |
| Sum of electronic and thermal Energies=      | -951.310279 |
| Sum of electronic and thermal Enthalpies=    | -951.309335 |
| Sum of electronic and thermal Free Energies= | -951.377064 |

|   |             |             |             |
|---|-------------|-------------|-------------|
| C | -2.93899700 | 1.53677300  | -0.51609400 |
| C | -3.33001800 | 0.18236800  | -0.24352100 |
| C | -2.33929300 | -0.68027000 | 0.25808500  |
| H | -3.63908900 | 2.22814000  | -0.97157700 |
| N | -1.78871000 | 2.04665700  | -0.20606800 |
| N | -0.87638300 | 1.22273100  | 0.38736600  |
| C | -0.03294100 | -0.65754000 | -1.26597500 |
| H | -0.74071600 | -0.28022300 | -1.99639200 |
| H | -0.08843100 | -1.73146600 | -1.12622700 |
| C | 1.23639700  | -0.06186600 | -1.27929500 |
| H | 1.35083800  | 0.87568500  | -1.80951900 |
| C | -0.97906400 | -0.16151700 | 0.34228000  |
| H | -0.32004100 | -0.65726400 | 1.04465100  |
| C | 0.38395300  | 1.78186700  | 0.61135200  |

|   |             |             |             |
|---|-------------|-------------|-------------|
| C | 1.20074200  | 1.25966700  | 1.62895000  |
| C | 0.69413400  | 3.04862300  | 0.08263800  |
| N | 1.88941700  | 0.82307800  | 2.45345500  |
| N | 1.01281900  | 4.07814000  | -0.34318200 |
| C | 2.45784200  | -0.64389700 | -0.77217800 |
| C | 3.67284900  | 0.04333200  | -0.96695900 |
| C | 2.50084500  | -1.88341900 | -0.10373900 |
| C | 4.87526900  | -0.48891900 | -0.52949300 |
| H | 3.65962500  | 1.00185800  | -1.47308900 |
| C | 3.70549300  | -2.41081700 | 0.33678300  |
| H | 1.59067400  | -2.44580500 | 0.06241600  |
| C | 4.89763200  | -1.72023100 | 0.12425100  |
| H | 5.79756500  | 0.05434900  | -0.69608600 |
| H | 3.71754800  | -3.36699000 | 0.84589900  |
| H | 5.83650100  | -2.13819600 | 0.46650800  |
| H | -4.22152000 | -3.46657800 | 0.66071900  |
| C | -3.96587400 | -2.44580000 | 0.40523800  |
| C | -4.95367500 | -1.58903200 | -0.09992300 |
| C | -2.66613100 | -2.00013100 | 0.58113300  |
| C | -4.64135800 | -0.28177300 | -0.42271800 |
| H | -5.96406300 | -1.95388900 | -0.23464100 |
| H | -1.90637700 | -2.66814200 | 0.96896400  |
| H | -5.39936000 | 0.38976800  | -0.80749500 |

CH<sub>3</sub>CN transition structure

|                | 1         | 2       | 3       |
|----------------|-----------|---------|---------|
|                | A         | A       | A       |
| Frequencies -- | -417.8401 | 29.7182 | 46.6946 |
| Red. masses -- | 11.3743   | 5.5301  | 5.5905  |
| Frc consts --  | 1.1700    | 0.0029  | 0.0072  |
| IR Inten --    | 851.3613  | 3.6999  | 3.9263  |

|                                              |             |
|----------------------------------------------|-------------|
| Sum of electronic and zero-point Energies=   | -951.328931 |
| Sum of electronic and thermal Energies=      | -951.310279 |
| Sum of electronic and thermal Enthalpies=    | -951.309335 |
| Sum of electronic and thermal Free Energies= | -951.377064 |

|   |             |             |             |
|---|-------------|-------------|-------------|
| C | -2.93689700 | 1.53748300  | -0.51884400 |
| C | -3.33032000 | 0.18396300  | -0.24533200 |
| C | -2.34140300 | -0.67929400 | 0.25882600  |
| H | -3.63518500 | 2.22945900  | -0.97619700 |
| N | -1.78637000 | 2.04608300  | -0.20768200 |
| N | -0.87606100 | 1.22171800  | 0.38807400  |



|   |             |             |             |
|---|-------------|-------------|-------------|
| C | -0.03258900 | -0.65948300 | -1.26475900 |
| H | -0.74108100 | -0.28307500 | -1.99494500 |
| H | -0.08749400 | -1.73330800 | -1.12405400 |
| C | 1.23588900  | -0.06230300 | -1.27791800 |
| H | 1.34911100  | 0.87530300  | -1.80830200 |
| C | -0.98087900 | -0.16228800 | 0.34437200  |
| H | -0.32253900 | -0.65877400 | 1.04686800  |
| C | 0.38473600  | 1.77905200  | 0.61290000  |
| C | 1.19946000  | 1.25504100  | 1.63144800  |
| C | 0.69671800  | 3.04584400  | 0.08496800  |
| N | 1.88542300  | 0.81621600  | 2.45692000  |
| N | 1.01721300  | 4.07477200  | -0.34069800 |
| C | 2.45845900  | -0.64323000 | -0.77192700 |
| C | 3.67261500  | 0.04500800  | -0.96789400 |
| C | 2.50331200  | -1.88265300 | -0.10364500 |
| C | 4.87594500  | -0.48636300 | -0.53196600 |
| H | 3.65802100  | 1.00376000  | -1.47356000 |
| C | 3.70883600  | -2.40930600 | 0.33520900  |
| H | 1.59368500  | -2.44558300 | 0.06367400  |
| C | 4.90011900  | -1.71776200 | 0.12141900  |
| H | 5.79753600  | 0.05789200  | -0.69922100 |
| H | 3.72223500  | -3.36542600 | 0.84440300  |
| H | 5.83970300  | -2.13491700 | 0.46270000  |
| H | -4.22763700 | -3.46298000 | 0.66162400  |
| C | -3.97035300 | -2.44281600 | 0.40530500  |
| C | -4.95630000 | -1.58544700 | -0.10246300 |
| C | -2.67047400 | -1.99838400 | 0.58286800  |
| C | -4.64190100 | -0.27891500 | -0.42610600 |
| H | -5.96690600 | -1.94925600 | -0.23840700 |
| H | -1.91213100 | -2.66658800 | 0.97310800  |
| H | -5.39857800 | 0.39307600  | -0.81274600 |

**Gas-phase B3LYP/6-311+G(2d,p) 1,3-dipolar 1 and MVK optimizations:**

transition structure

|                                            | 1         | 2           | 3       |
|--------------------------------------------|-----------|-------------|---------|
|                                            | A         | A           | A       |
| Frequencies --                             | -409.6176 | 31.3064     | 58.0059 |
| Red. masses --                             | 10.7654   | 5.3210      | 6.5169  |
| Frc consts --                              | 1.0642    | 0.0031      | 0.0129  |
| IR Inten --                                | 157.2157  | 3.3732      | 2.2452  |
| Sum of electronic and zero-point Energies= |           | -872.924426 |         |
| Sum of electronic and thermal Energies=    |           | -872.906963 |         |

Sum of electronic and thermal Enthalpies= -872.906019  
Sum of electronic and thermal Free Energies= -872.970149

|   |             |             |             |
|---|-------------|-------------|-------------|
| C | 0.66580500  | -1.67952700 | -1.29439300 |
| N | -0.59030500 | -1.51302400 | -1.03748500 |
| H | 0.87041000  | -2.22193200 | -2.21168100 |
| N | -0.90925100 | -0.87308800 | 0.12899500  |
| C | -3.17626500 | -1.00254400 | -0.71591700 |
| C | -2.75451700 | -0.45269500 | 1.59947800  |
| N | -3.98064300 | -1.32563700 | -1.47474700 |
| N | -3.12800600 | -0.37779000 | 2.68731500  |
| C | -0.81437800 | 1.93521900  | 0.31152100  |
| H | -0.72817400 | 2.31912400  | 1.32188200  |
| C | 0.31528000  | 2.29879800  | -0.54173200 |
| O | 1.33163400  | 2.78152300  | -0.05413500 |
| C | -2.25733000 | -0.46456600 | 0.24776700  |
| C | -2.08077400 | 1.51515500  | -0.14126400 |
| H | -2.95170300 | 1.82778600  | 0.42277100  |
| H | -2.25939800 | 1.45858900  | -1.20901300 |
| C | 0.00528300  | -0.22364000 | 0.90251500  |
| H | -0.33595300 | 0.09275400  | 1.87428800  |
| C | 1.74436000  | -1.20697900 | -0.47676400 |
| C | 3.09255000  | -1.45156800 | -0.76818900 |
| C | 1.39273300  | -0.45788800 | 0.66711900  |
| C | 4.07345700  | -0.95012900 | 0.06560900  |
| H | 3.35505300  | -2.03023200 | -1.64613000 |
| C | 2.40042200  | 0.05468000  | 1.49740100  |
| C | 3.72450400  | -0.19494300 | 1.19470600  |
| H | 5.11754500  | -1.13297700 | -0.15561600 |
| H | 2.13481500  | 0.65538000  | 2.35763600  |
| H | 4.50355900  | 0.20522200  | 1.83145100  |
| C | 0.21990700  | 2.10694000  | -2.04769900 |
| H | -0.27049600 | 1.17524000  | -2.33413200 |
| H | -0.36075600 | 2.92775200  | -2.47930400 |
| H | 1.22323300  | 2.13998300  | -2.46856000 |

**Gas-phase B3LYP/6-311+G(2d,p) 1,3-dipolar 1 and MAC optimizations:**  
transition structure

|                | 1         | 2       | 3       |
|----------------|-----------|---------|---------|
|                | A         | A       | A       |
| Frequencies -- | -412.3038 | 30.2289 | 45.9713 |
| Red. masses -- | 10.8425   | 5.2342  | 5.1990  |
| Frc consts --  | 1.0860    | 0.0028  | 0.0065  |

IR Inten -- 145.3863 1.0663 0.4455

Sum of electronic and zero-point Energies= -948.176536  
Sum of electronic and thermal Energies= -948.158068  
Sum of electronic and thermal Enthalpies= -948.157124  
Sum of electronic and thermal Free Energies= -948.223895

|   |             |             |             |
|---|-------------|-------------|-------------|
| C | -0.56027500 | -1.05052800 | 1.85504300  |
| N | 0.69774400  | -0.94246500 | 1.58329700  |
| H | -0.79116100 | -1.10030600 | 2.91407200  |
| N | 1.05148700  | -0.91446400 | 0.26243300  |
| C | 3.26565200  | -0.44521500 | 1.12737200  |
| C | 2.95704200  | -1.10494400 | -1.17805800 |
| N | 4.04156400  | -0.30239100 | 1.96696000  |
| N | 3.38978400  | -1.52614400 | -2.16004700 |
| C | 0.80618800  | 1.43490700  | -1.26474000 |
| H | 0.75129100  | 1.32121200  | -2.33935400 |
| C | -0.38684600 | 2.05137100  | -0.69655900 |
| O | -1.40504000 | 2.27924000  | -1.31991400 |
| C | 2.37961100  | -0.51479100 | 0.00063300  |
| C | 2.05701100  | 1.39824100  | -0.62745700 |
| H | 2.94533500  | 1.47075300  | -1.24308500 |
| H | 2.14318000  | 1.86849700  | 0.34437200  |
| C | 0.15537500  | -0.80601000 | -0.75766700 |
| H | 0.53982800  | -0.98474200 | -1.74834400 |
| C | -1.61070800 | -1.10949500 | 0.88084600  |
| C | -2.96042500 | -1.27796300 | 1.21810700  |
| C | -1.22927400 | -1.00096300 | -0.47364500 |
| C | -3.91377900 | -1.33231700 | 0.21993300  |
| H | -3.24509900 | -1.36528600 | 2.26024000  |
| C | -2.21020800 | -1.05272900 | -1.47603600 |
| C | -3.53529200 | -1.21798200 | -1.12615600 |
| H | -4.95839100 | -1.46049300 | 0.47466000  |
| H | -1.92395300 | -0.94784500 | -2.51487900 |
| H | -4.29284300 | -1.25278000 | -1.89914200 |
| O | -0.26460400 | 2.34194500  | 0.62884600  |
| C | -1.39391900 | 2.99573600  | 1.22517000  |
| H | -1.12220500 | 3.15532900  | 2.26614500  |
| H | -1.58871700 | 3.94833700  | 0.73248700  |
| H | -2.28509300 | 2.37217400  | 1.15217200  |

**Gas-phase B3LYP/6-311+G(2d,p) 1,3-dipolar 1 and STY optimizations:**  
transition structure

|                                              | 1           | 2           | 3           |
|----------------------------------------------|-------------|-------------|-------------|
|                                              | A           | A           | A           |
| Frequencies --                               | -416.8231   | 24.8506     | 45.3160     |
| Red. masses --                               | 11.4991     | 5.3364      | 5.0119      |
| Frc consts --                                | 1.1771      | 0.0019      | 0.0061      |
| IR Inten --                                  | 217.2986    | 1.3937      | 1.6241      |
| Sum of electronic and zero-point Energies=   |             | -951.306254 |             |
| Sum of electronic and thermal Energies=      |             | -951.287575 |             |
| Sum of electronic and thermal Enthalpies=    |             | -951.286631 |             |
| Sum of electronic and thermal Free Energies= |             | -951.354427 |             |
| C                                            | -2.87675900 | 1.58908400  | -0.53604400 |
| C                                            | -3.34660800 | 0.25902400  | -0.26882700 |
| C                                            | -2.41212700 | -0.64551500 | 0.26948500  |
| H                                            | -3.52581300 | 2.31676000  | -1.01147600 |
| N                                            | -1.70986600 | 2.04082400  | -0.20279300 |
| N                                            | -0.85511600 | 1.18054100  | 0.41761900  |
| C                                            | -0.02798700 | -0.72595500 | -1.24826200 |
| H                                            | -0.76085600 | -0.38280000 | -1.97019100 |
| H                                            | -0.05402200 | -1.79656900 | -1.07835800 |
| C                                            | 1.21116300  | -0.07876000 | -1.25862500 |
| H                                            | 1.28446400  | 0.85996100  | -1.79451300 |
| C                                            | -1.04020700 | -0.19395400 | 0.39330600  |
| H                                            | -0.40444100 | -0.72224500 | 1.09182800  |
| C                                            | 0.42676500  | 1.66305000  | 0.65817700  |
| C                                            | 1.19492900  | 1.03839700  | 1.66168800  |
| C                                            | 0.80420800  | 2.93671700  | 0.18142000  |
| N                                            | 1.81225500  | 0.48540500  | 2.47018200  |
| N                                            | 1.18821700  | 3.95197900  | -0.21757000 |
| C                                            | 2.46720200  | -0.61951100 | -0.78126300 |
| C                                            | 3.65056600  | 0.10971700  | -1.00216900 |
| C                                            | 2.57017300  | -1.85183800 | -0.11160900 |
| C                                            | 4.87958800  | -0.37794700 | -0.58968100 |
| H                                            | 3.59115300  | 1.06975600  | -1.50243000 |
| C                                            | 3.80084100  | -2.33647300 | 0.30279700  |
| H                                            | 1.68233600  | -2.44106700 | 0.08261500  |
| C                                            | 4.96116600  | -1.60561800 | 0.06339200  |
| H                                            | 5.77682000  | 0.20119900  | -0.77182700 |
| H                                            | 3.85698900  | -3.28689400 | 0.81985200  |
| H                                            | 5.92118100  | -1.98647200 | 0.39006900  |
| H                                            | -4.43625900 | -3.34302700 | 0.61429400  |
| C                                            | -4.12491900 | -2.33617000 | 0.36420500  |
| C                                            | -5.05501200 | -1.43687900 | -0.17609800 |

|   |             |             |             |
|---|-------------|-------------|-------------|
| C | -2.81507100 | -1.94871400 | 0.58417300  |
| C | -4.67078800 | -0.14756300 | -0.48971300 |
| H | -6.07639000 | -1.75514100 | -0.34368600 |
| H | -2.10134500 | -2.64775400 | 1.00478600  |
| H | -5.38499100 | 0.55649500  | -0.90113500 |
